# Supplementary material for: A fluorescent microbead-based microfluidic immunoassay chip for immune cell cytokine secretion quantification
Source: Royal Society of Chemistry journal article supplement (doi:10.1039/c7lc01183k), 2018-01-01
Supplement: c7lc01183k1.pdf [file c7lc01183k1.pdf]

## SUPPLEMENTARY MATERIALS

### **A Fluorescence Microbead-based Microfluidic Immunoassay Chip for Immune Cell Cytokine Profiling**

Xin Cui<sup>#,1,2</sup>, Ya Liu<sup>#,1</sup>, Dinglong Hu<sup>1</sup>, Weiyi Qian<sup>2</sup>, Chung Tin<sup>1,3,4,5</sup>, Dong Sun<sup>1,3</sup>, Weiqiang Chen<sup>\*,2</sup>, and  
Raymond H. W. Lam<sup>\*,1,3,4,5</sup>

<sup>1</sup> Department of Mechanical and Biomedical Engineering, City University of Hong Kong, Hong Kong

<sup>2</sup> Department of Mechanical and Aerospace Engineering, New York University, NY, USA

<sup>3</sup> Centre for Robotics and Automation, City University of Hong Kong

<sup>4</sup> Centre for Biosystems, Neuroscience, and Nanotechnology, City University of Hong Kong

<sup>5</sup> City University of Hong Kong Shenzhen Research Institute, Shenzhen, China

# These authors contributed equally to this work.

\*Correspondence should be addressed to R.H.W. Lam (email address: rhwlam@cityu.edu.hk; Tel: +852-3442-8577; Fax: +852-3442-0172) and W. Chen (email address: wchen@nyu.edu; Tel: +1-646-997-3767; Fax: +1-646-997-3136)

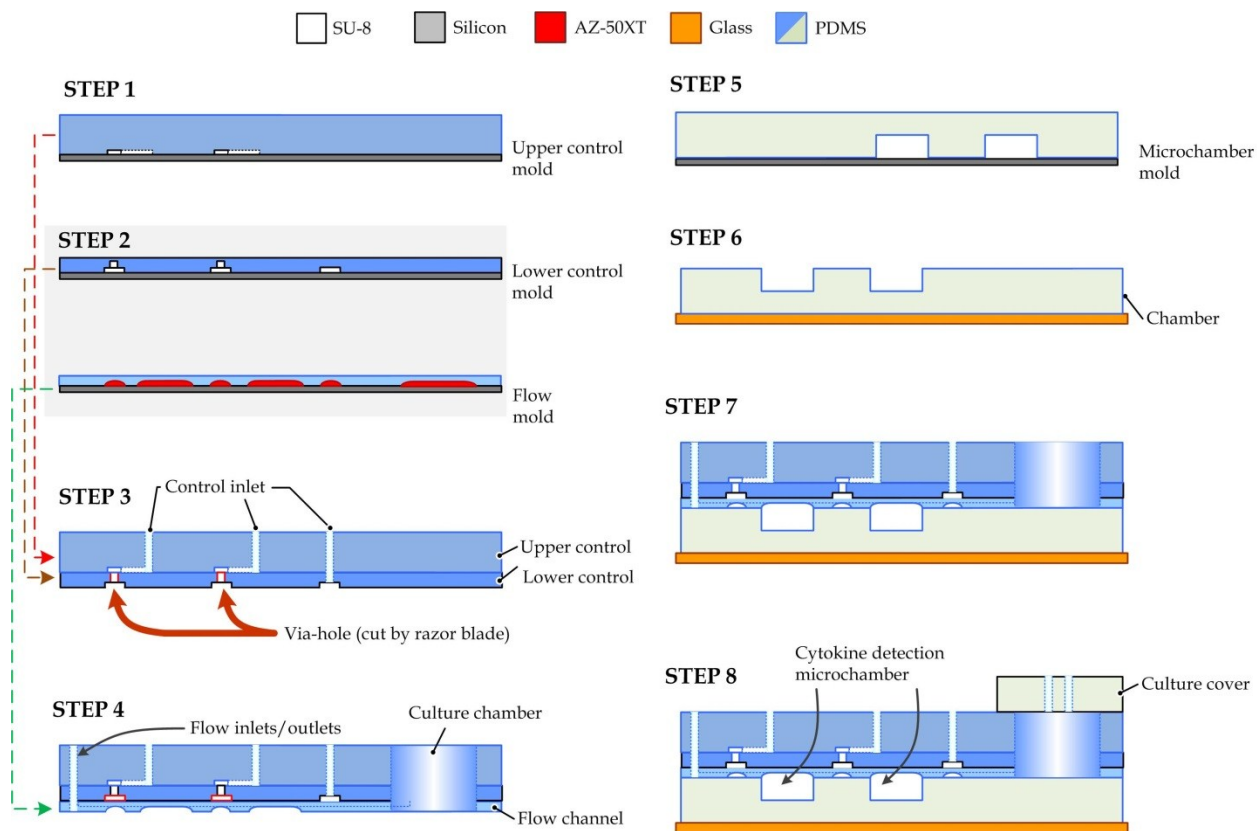

**Figure S1.** Fabrication of the microfluidic immunoassay device.

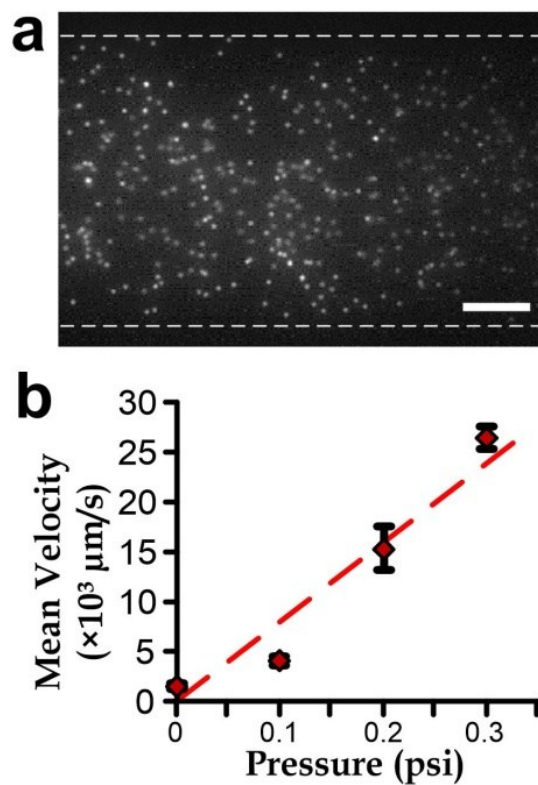

**Figure S2.** Flow rate measurement of the ‘Extraction’ microchannel. (a) A snapshot of fluorescence microbeads flowing along the microchannel driven by an inlet pressure of 0.2 psi. Hidden lines are the channel edges. Scale bar: 20  $\mu\text{m}$ . (b) Average microbead velocity against inlet pressure. The error bars are standard deviations.

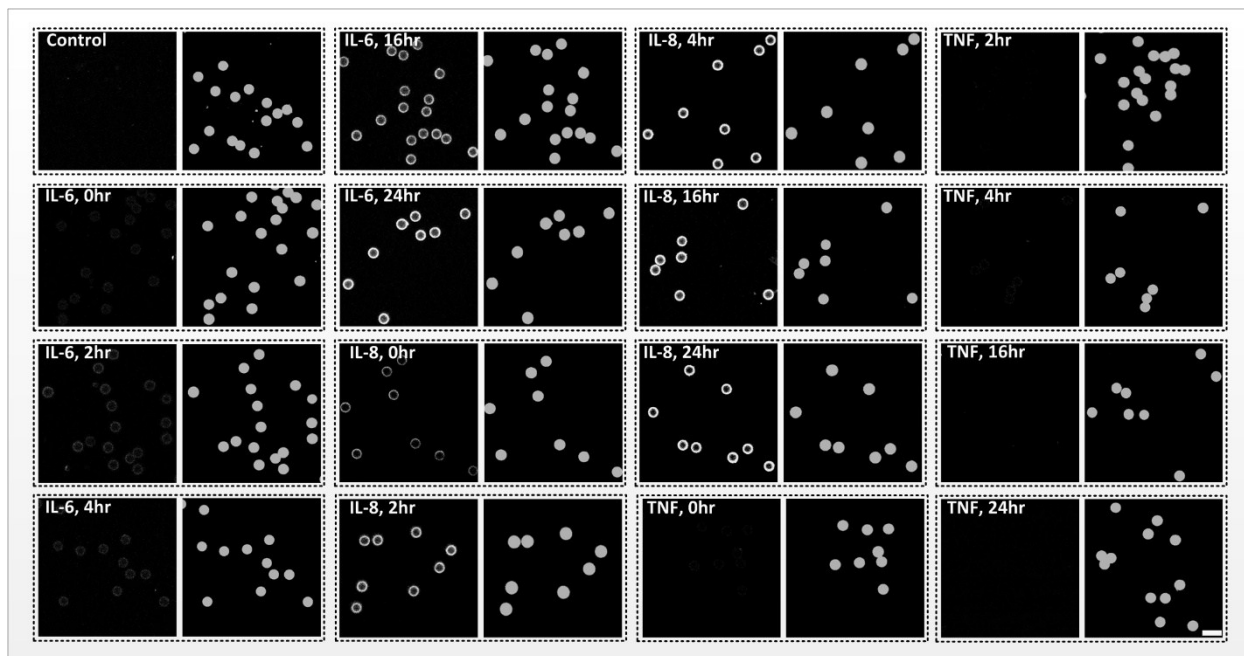

**Figure S3.** Fluorescent images of cytokine-sensitive intensities(488 nm) and cytokine beads(647 nm) in the 16 chambers for detecting three different cytokines(IL-6, IL-8 and TNF) expression at 5 time points after on-chip incubation and PHA(3pg/mL) stimulation. Scale bar: 10μm.

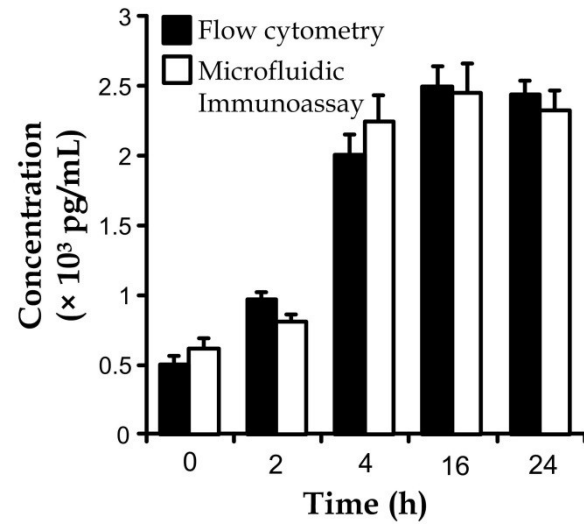

**Figure S4.** Cytokine secretion profiles of IL-8 stimulated by 5  $\mu$ g/ml of PHA measured by the flow cytometry and the microfluidic immunoassay device.

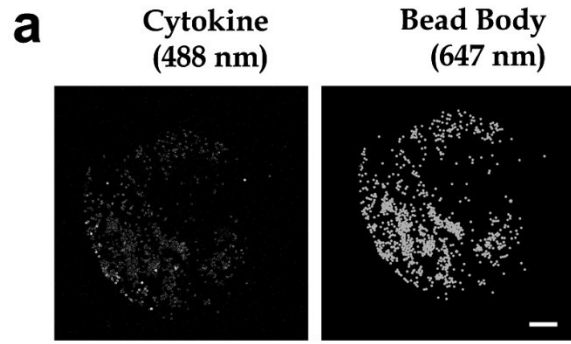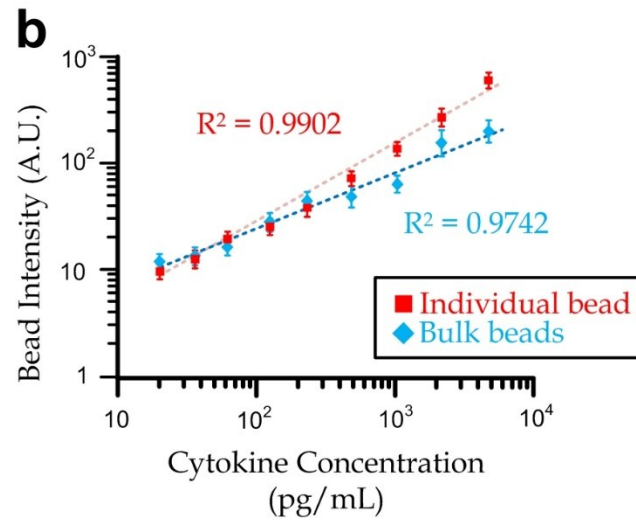

**Figure S5.** (a) Fluorescence micrographs of cytokine-sensitive intensities (488 nm) microbead and bodies (647 nm) in the whole chamber. (b) Calibration curves for IL-8 between individual and bulk bead intensities in the detection microchambers. Scale bar: 100  $\mu\text{m}$ .
